# Supplementary material for: Supramolecular self-assemblies of inverted cucurbit[7]uril with biogenic amines
Source: Royal Society of Chemistry journal article supplement (doi:10.1039/c8nj04697b), 2018-11-16
Supplement: c8nj04697b1.pdf [file c8nj04697b1.pdf]

## Supporting Information

### Supramolecular Self-assemblies of Inverted Cucurbit[7]uril with Biogenic Amines

Pei-Hui Shan,<sup>a</sup> Zhi-Rui Zhang,<sup>b</sup> Dong Bai,<sup>a</sup> Bing Bian,<sup>c</sup> Zhu Tao,<sup>a</sup> and Xin Xiao,<sup>a\*</sup>

---

a P. H. Shan, X. Xiao, D. Bai, Z. Tao

Key Laboratory of Macrocyclic and Supramolecular Chemistry of Guizhou Province, Guizhou University,  
Guiyang 550025, China

b Z. R. Zhang

Department of Pediatric, The Ninth People's Hospital Of Chongqing, Chongqing 400700, China

c B. Bian

College of Chemistry and Environmental Engineering, Shandong University of Science and Technology,  
Qingdao 266590, China.

#### Table of Contents

|                                                                                                           |   |
|-----------------------------------------------------------------------------------------------------------|---|
| Figure S1. <sup>1</sup> H NMR spectroscopic data of <i>i</i> Q[7] with guest HI in D <sub>2</sub> O.....  | 2 |
| Figure S2. <sup>1</sup> H NMR spectroscopic data of <i>i</i> Q[7] with guest SPD in D <sub>2</sub> O..... | 2 |
| Figure S3. 2D COSY spectra of <i>i</i> Q[7] with guest SPM in D <sub>2</sub> O.....                       | 3 |
| Figure S4. 2D COSY spectra of <i>i</i> Q[7] with guest SPD in D <sub>2</sub> O.....                       | 3 |
| Figure S5. ITC profile of <i>i</i> Q[7] with Five biogenic amines.....                                    | 4 |

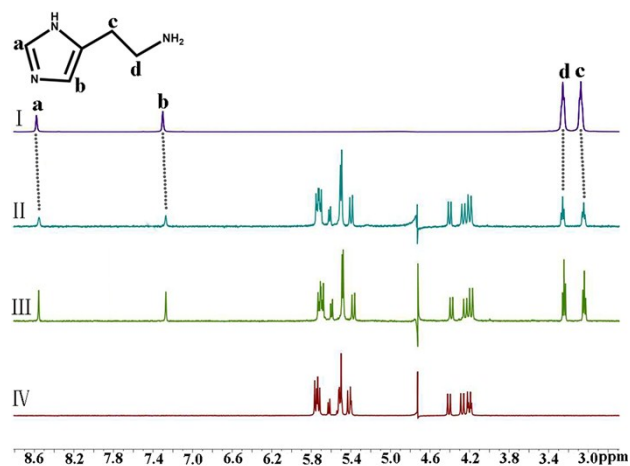

**Figure S1**  $^1\text{H}$  NMR spectra (400 MHz,  $\text{D}_2\text{O}$ ) of *i*Q[7] in the absence (IV) and presence of 0.67 (II), 1.05 (III) equiv. of HI and free guest HI (I) at 20 °C.

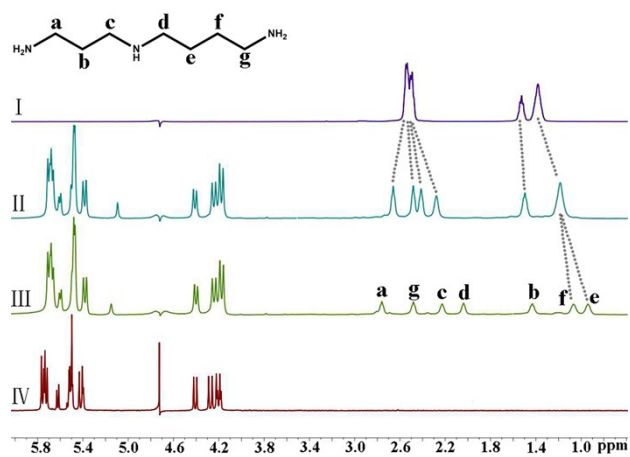

**Figure S2**  $^1\text{H}$  NMR spectra (400 MHz,  $\text{D}_2\text{O}$ ) of *i*Q[7] in the absence (IV) and presence of 0.78 (II), 0.96 (III) equiv. of SPD and free guest SPD (I) at 20 °C.

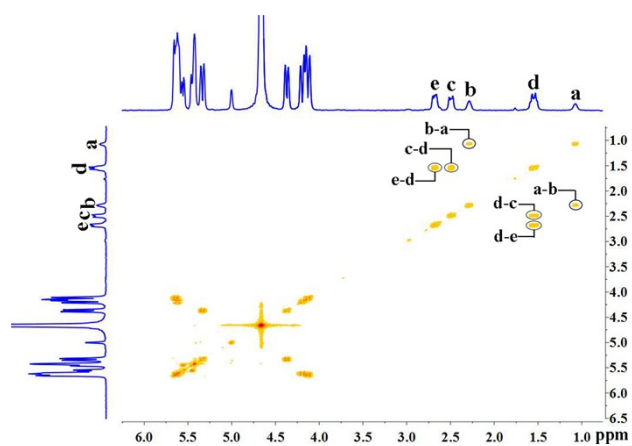

**Figure S3** 2D COSY NMR spectrum of SPM in prescence of 1.05 eq *i*Q[7] in D<sub>2</sub>O at 20°C.

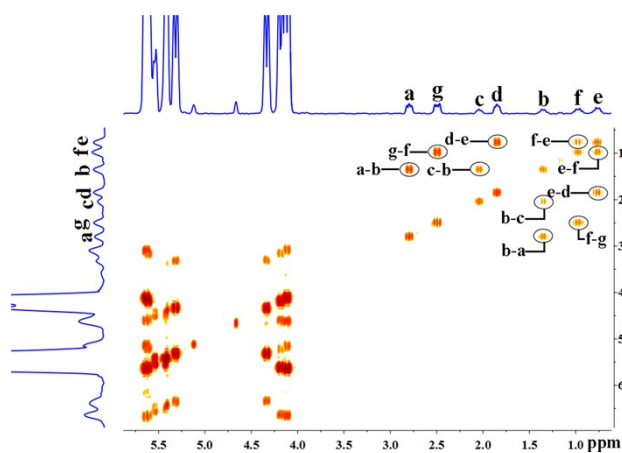

**Figure S4** 2D COSY NMR spectrum of SPD in prescence of 0.65 eq *i*Q[7] in D<sub>2</sub>O at 20°C

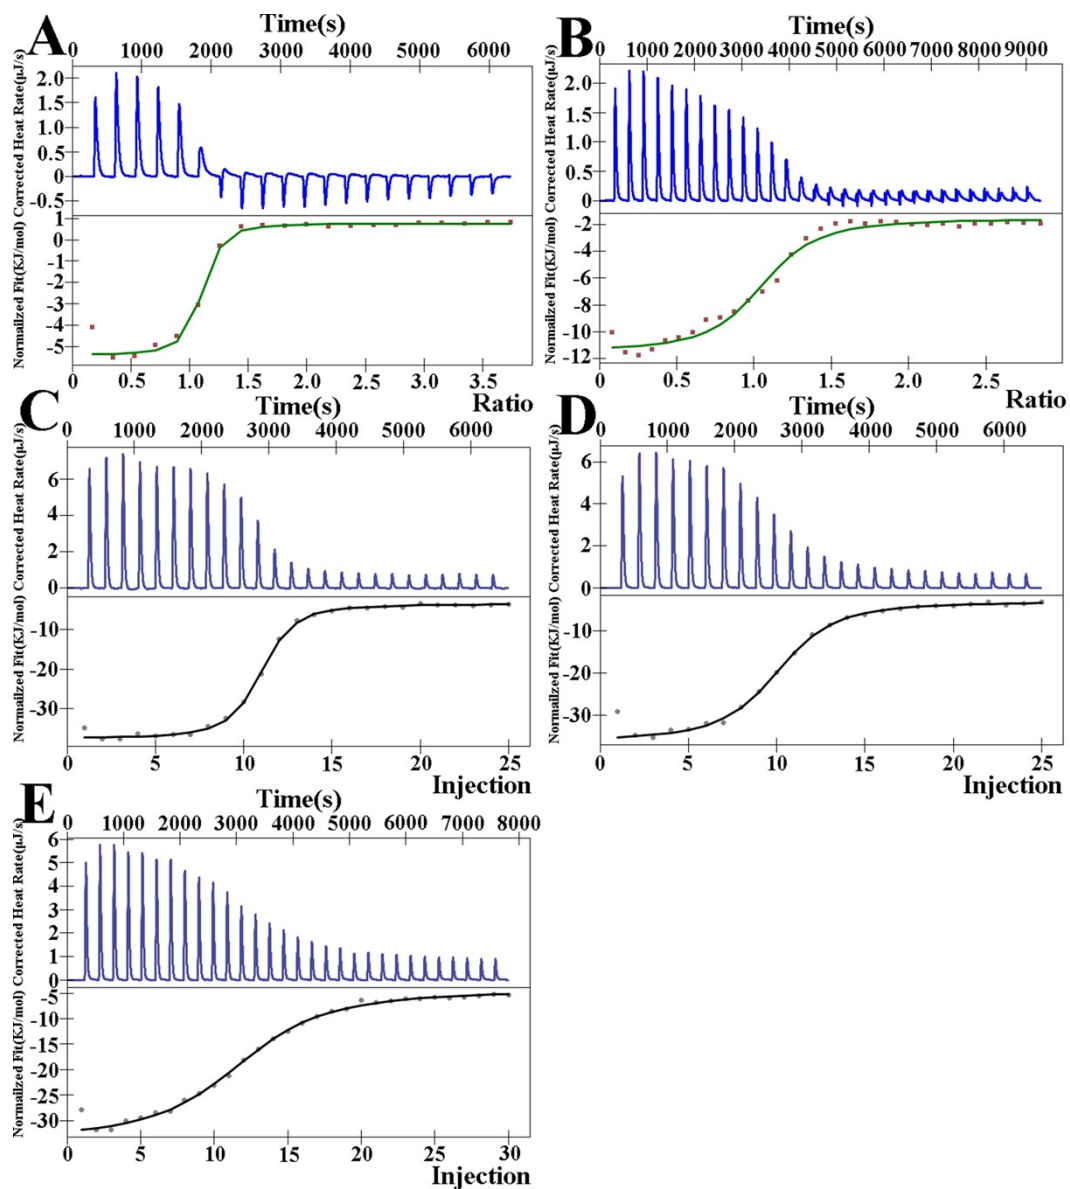

**Figure S5** ITC profile of *i*Q[7] with SPM(A)、SPD(B)、PEA(C)、TA(D) and TR(E) in aqueous solution at 25°C.
